# Supplementary material
Source: publisher site journal article supplement (https://www.dovepress.com/get_supplementary_file.php?f=295814T1.xlsx)
Supplement: Supplementary file 1 [file get_supplementary_file.php]

## Sheet: Sheet1
Supplementary Table 1. Thirty-Two tissue samples
Number	Sex	Age	Tumor size	Tumor number	Metastasis	Pathological type	Differentiation	HBV infection	Alpha-fetoprotein (AFP)(ng/ml)	Cirrhosis	Remark
1	Female	59	3.6×3.8 cm	One	No	Hepatocellular	Moderate/poor	No	＜400	Yes	Both
2	Female	31	18×12 cm	One	No	Hepatocellular	Moderate/poor	No	≥400	No
3	Female	63	3.0×2.5 cm	One	No	Hepatocellular	Moderate/poor	Yes	＜400	Yes
4	Male	60	4.1×4.2 cm	One	No	Hepatocellular	Moderate/poor	Yes	＜400	No
5	Male	55	3×2.9 cm	One	No	Hepatocellular	Moderate/poor	Yes	＜400	Yes
6	Male	36	4.2×3.5 cm	One	No	Hepatocellular	Moderate/poor	Yes	＜400	No
7	Male	41	4.0×2.3 cm	One	No	Hepatocellular	Well	Yes	＜400	Yes
8	Male	50	5×3.5 cm	One	No	Hepatocellular	Moderate/poor	Yes	＜400	Yes
9	Male	55	11.8×10.9 cm	One	No	Hepatocellular	Well	Yes	＜400	No
10	Male	79	7.8×6.5 cm	One	No	Hepatocellular	Moderate/poor	Yes	＜400	Yes
11	Male	50	4.4×4.2 cm	One	No	Hepatocellular	Well	Yes	＜400	No
12	Male	76	3.2×1.7 cm	One	No	Hepatocellular	Moderate/poor	Yes	＜400	Yes
13	Male	73	4.6×4.0 cm	One	No	Hepatocellular	Moderate/poor	Yes	＜400	Yes
14	Male	65	16.0×7.0 cm	More than three	Yes	Hepatocellular	Moderate/poor	No	＜400	Yes
15	Male	48	5.5×8 cm(the biggest)	More than three	No	Hepatocellular	Moderate/poor	Yes	≥400	Yes
16	Male	46	1.6×1.3 cm	One	No	Hepatocellular	Moderate/poor	Yes	＜400	Yes
17	Male	56	2.01×1.81 cm	One	No	Hepatocellular	Moderate/poor	Yes	＜400	No
18	Male	56	12.0×10.0cm	One	No	Hepatocellular	Moderate/poor	Yes	≥400	Yes
19	Female	58	4.6×3.7 cm	One	No	Hepatocellular	Moderate/poor	Yes	≥400	No	LINC01268
20	Male	53	3.0×2.4 cm	One	No	Hepatocellular	Moderate/poor	Yes	＜400	Yes
21	Male	63	1.8×1.7 cm	One	No	Hepatocellular	Moderate/poor	No	＜400	No
22	Male	46	2.9×2.1 cm	One	No	Hepatocellular	Moderate/poor	Yes	≥400	Yes
23	Male	49	4.1×4.3 cm	One	No	Hepatocellular	Moderate/poor	No	＜400	Yes
24	Male	73	2.3×1.9 cm & 2.4×1.8 cm	Two	No	Hepatocellular	Moderate/poor	Yes	＜400	Yes
25	Male	61	2.5×2.0 cm	One	No	Hepatocellular	Well	Yes	＜400	Yes
26	Male	65	4.0×3.2 cm	One	No	Hepatocellular	Well	Yes	＜400	No
27	Male	51	2.9×2.7 cm	One	No	Hepatocellular	Well	Yes	＜400	Yes
28	Male	63	3.0×2.3 cm	One	No	Hepatocellular	Well	Yes	＜400	Yes
29	Male	54	5.3×7.1 cm (the biggest)	More than three	No	Hepatocellular	Well	Yes	＜400	Yes
30	Male	70	4.0×3.7 cm	One	No	Hepatocellular	Moderate/poor	No	＜400	Yes
31	Male	64	2.5×1.8 cm	One	No	Hepatocellular	Moderate/poor	Yes	＜400	Yes
32	Male	69	7.0×5.8 cm	One	No	Hepatocellular	Moderate/poor	No	＜400	Yes
33	Female	26	9.4×7.2 cm	One	No	Hepatocellular	Moderate/poor	Yes	≥400	No	MAP3K7
34	Female	43	18.3×22.2 cm	One	No	Hepatocellular	Moderate/poor	No	＜400	No
35	Female	55	6.15×6.90 cm (the biggest)	More than three	No	Hepatocellular	Moderate/poor	Yes	＜400	No
36	Female	59	3.5×3.7 cm	One	No	Hepatocellular	Well	Yes	≥400	No
37	Female	51	10.0×6.0 cm	One	No	Hepatocellular	Moderate/poor	Yes	＜400	No
38	Male	66	3.1×2.2 cm	One	No	Hepatocellular	Moderate/poor	Yes	＜400	No
39	Male	47	5.7×6.2 cm	One	No	Hepatocellular	Moderate/poor	Yes	＜400	Yes
40	Male	50	3.0×2.4 cm	One	No	Hepatocellular	Moderate/poor	Yes	＜400	Yes
41	Male	51	4.0×3.5 cm	One	No	Hepatocellular	Moderate/poor	Yes	＜400	Yes
42	Male	57	16.0×12.0 cm	One	No	Hepatocellular	Moderate/poor	Yes	≥400	No
43	Male	67	10.25×8.12 cm	One	No	Hepatocellular	Moderate/poor	Yes	＜400	Yes
44	Male	63	7.3×4.7 cm	One	Yes	Hepatocellular	Moderate/poor	No	＜400	Yes
45	Male	56	6.0×4.5 cm	One	No	Hepatocellular	Well	Yes	＜400	Yes
46	Male	39	6.5×4 cm	One	No	Hepatocellular	Well	Yes	＜400	Yes
